# Supplementary material for: Trypanosoma cruzi Presenilin-Like Transmembrane Aspartyl Protease: Characterization and Cellular Localization
Source: Biomolecules. 2020 Nov 17;10(11):1564. doi: 10.3390/biom10111564 (PMC7698364; doi:10.3390/biom10111564)
Supplement: Supplementary file 1 [file biomolecules-10-01564-s001.pdf]

## Supplementary Material

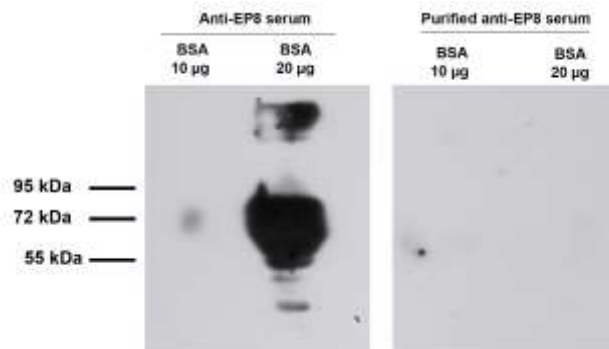

**Figure S1:** Western blot analysis of rabbit anti-EP8 depleted of anti-BSA antibodies by a Sepharose-BSA column. SDS-PAGE (10%) of BSA (10 and 20 µg) under reducing conditions, revealed by chemiluminescence using anti-EP8 peptide polyclonal rabbit sera before and after purification in Sepharose-BSA column.

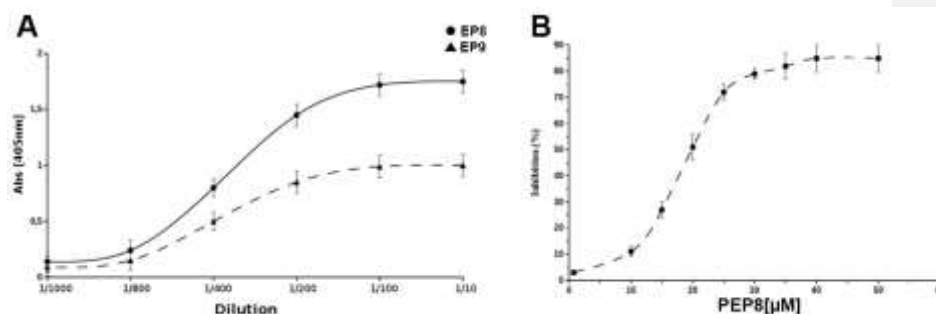

**Figure S2: Performance and specificity of the rabbit sera anti-synthetic peptide EP8 and EP9.** Two individual rabbits were immunized with either synthetic peptide EP8 or EP9 and serum collected on day 42. Sera sensitivity was evaluated by ELISA using a dilution series (Panel A; ● Rabbit #1, EP8 and ▲ Rabbit #2, EP9). Due to the higher sensitivity of the anti-EP8 serum, a competition assay was performed with increasing concentrations of purified peptide (Panel B; 0.75 µM

to 50  $\mu$ M). The percent inhibition of binding was calculated with 100% as the value in the absence of competing peptide.

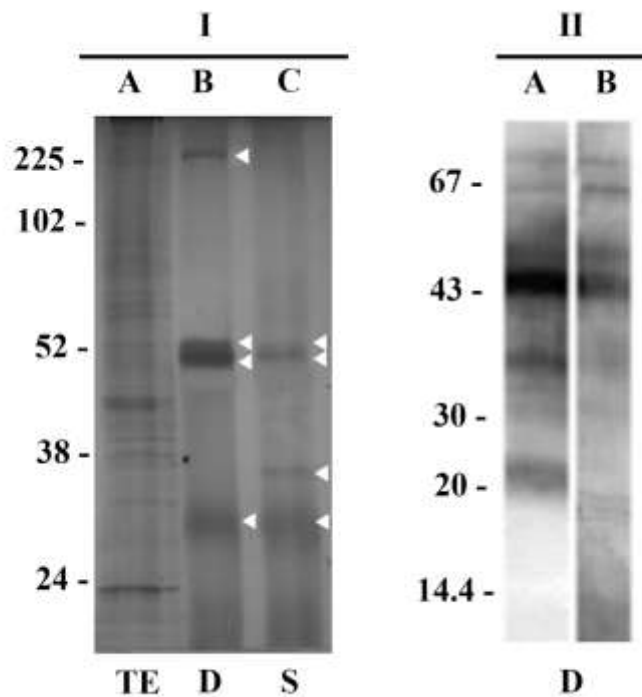

**Figure S3:** SDS-PAGE (I) and western blot (II) of *T. cruzi* epimastigote detergent (S) and soluble (S) fractions. Analysis by SDS-PAGE and silver staining of the proteins of the total extract (TE), detergent (D) and soluble (S) fraction of *T. cruzi* epimastigotes obtained using the methodology described previously [22] and purified by pepstatin-Agarose column (Panel I). Panel II show western blotting analyzes of the affinity column purified fractions reacting with anti-detergent fraction immunized rabbit (A) and pool of sera from chagasic patients ( $n = 5$ ) (B). Panel I analyzed about 25  $\mu$ g /slot and panels II (about 70  $\mu$ g/slot). The antibody reactivities were revealed with goat anti-human and anti-rabbit IgG peroxidase-conjugated, followed by incubation with  $H_2O_2$  and 3,3'-diaminobenzidine. The white arrows indicate the position of main bands in the detergent and soluble fractions. Molecular mass values of standard proteins ( $Mr \times 10^3$ ) are indicated in the left.

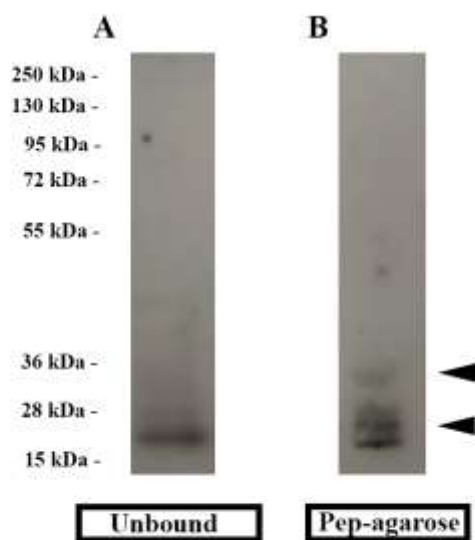

**Figure S4:** *T. cruzi* PS-like binds to pepstatin-agarose. Parasite lysates (40  $\mu$ g) were adsorbed onto pepstatin-agarose, and the proteins that remained bound were analyzed by Western blotting with anti-EP8 sera. Panel A: Correspond to the total cell lysate unbound to pepstatin-agarose after incubation for 24 hours at 4°C in STE buffer. Panel B: Proteins bound to pepstatin-agarose revealed by anti-EP8 sera. Note that PS-like bands corresponding to ~24 kDa and ~32 kDa (arrowhead), also identified in total extract, were absorbed to pepstatin agarose.

Formatado: Fonte: Não Negrito

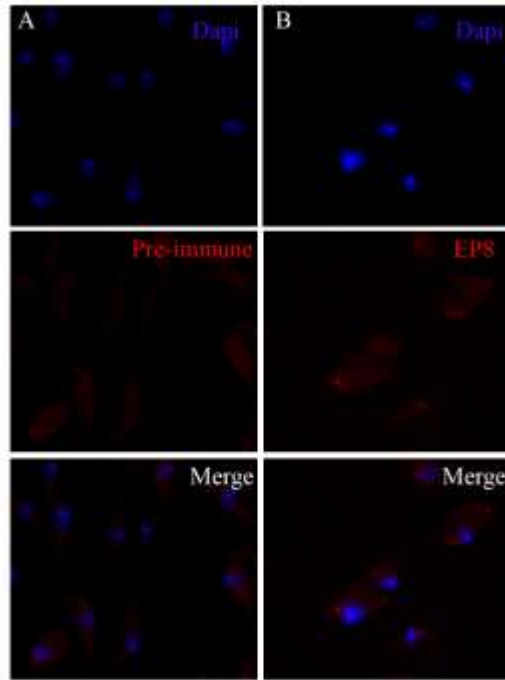

**Figure S5:** Immunofluorescent localization of *T. cruzi* PS-like protein in *T. cruzi* epimastigotes. Parasites were cultivated in BHI medium supplemented with 10% FBS, using rabbit anti-EP8 sera and pre-immune sera (A) Parasites were incubated overnight with pre-immune sera (red, Panel A), anti-EP8 (red, Panel B).

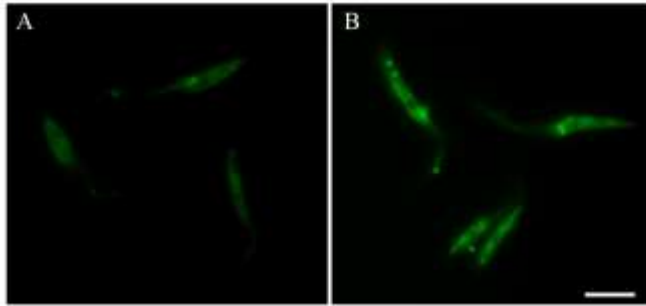

**Figure S6:** Autophagic vacuoles labeled with monodansylcadaverine (MDC) increase during epimastigotes serum deprivation. (A) Labeling of autophagic vacuoles in epimastigotes cultivated in BHI medium supplemented with 10% FBS under standard conditions. (B) Epimastigotes incubated in BHI medium without FBS for 24 hours, showing numerous of MDC-labeled vesicles. Scale bar = 10  $\mu$ m.
